# Supplementary material for: Expression QTL-based analyses reveal the mechanisms underlying colorectal cancer predisposition
Source: Springer Nature journal article supplement (doi:10.1007/s13277-014-2583-8), 2014-09-08
Supplement: MOESM2 [file 9257448]

Table S2. Clinical and pathologic data of 146 patients.

| **Characteristic** | **Sample size** |
| --- | --- |
| **Age at surgery**  ≤60  >60 | 27(18%)  119(82%) |
| **Sex**  Male  Female | 76(52%)  70(48%) |
| **T category (7th edition)**  T1  T2  T3  T4 | 6(4%)  32(22%)  94(65%)  14(9%) |
| **N category (7th edition)**  N0  N1  N2  **TNM category (7th edition)**  Ⅰ  Ⅱ  Ⅲ  Ⅳ | 83(56%)  33(23%)  30(21%)  28(19%)  56(38%)  39(27%)  23(16%) |
